# Supplementary material
Source: Springer Nature journal article supplement (https://www.springermedizin.de/resource/supplementary/13685_2013_33_MOESM2_ESM.pdf/9681248)

## Bilayer forming lipids

### Phosphatidylcholine

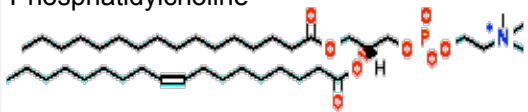

### Phosphatidylinositol

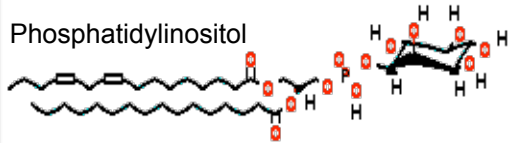

### Phosphatidylserine

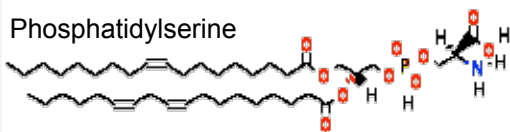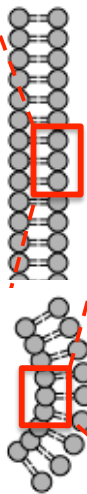

## Curvature forming lipids

### Phosphatidylethanolamine

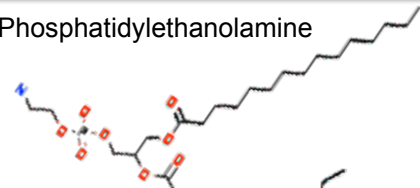

### Phosphatidic acid

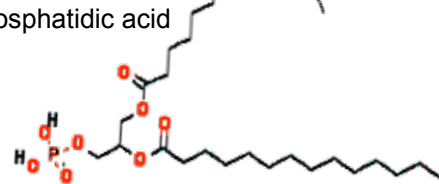

### Cardiolipin

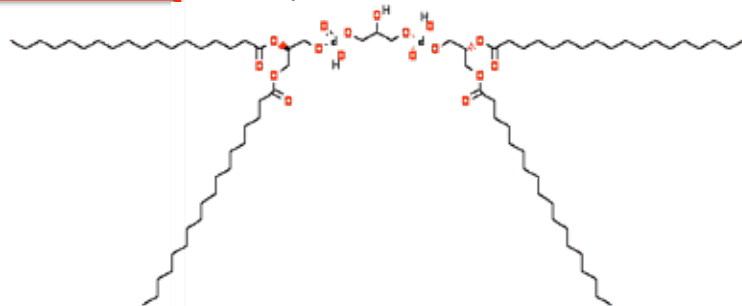

Supplement: MOESM2 [file 9681248]
